# Supplementary material for: Metabolic profiling putatively identifies plasma biomarkers of male infertility using UPLC-ESI-IT-TOFMS
Source: Royal Society of Chemistry journal article supplement (doi:10.1039/c8ra01897a), 2018-01-01
Supplement: c8ra01897a1.pdf [file c8ra01897a1.pdf]

#### Standard substance

Folic acid, uridine, cytidine, deoxycytidine, N-phenylacetylaspartic acid, hexanoylcarnitine, carnitine 12:0, LysoPC (14:0), LysoPC (18:0), LysoPE (22:0)

#### Sample information

Two hundreds and three individuals collected from June 2015 to December 2015 were divided into 7 groups: one group containing 203 men who attended the Xiangya hospital because of conception failure for at least 12 months was defined as male infertility (MI). The MI patients included 45 erectile dysfunction patients, 56 asthenozoospermia patients and 36 oligozoospermia patients, 9 teratospermia patients, 4 necrospermia patients, 3 cryptozoospermia patients, 7 azoospermia patients. The other group containing 43 age-matched fertile men was defined as healthy controls. Referring to fifth edition World Health Organization (WHO) Laboratory Manual for the Examination and Processing of Human Semen, oligozoospermia was defined as total sperm number <40 million per ejaculate; asthenozoospermia was defined with the following ranges: rapid progressive motility (a)<25% or rapid progressive motility(a) + slow progressive motility (b)<50%. According to International Index of Erectile Function (IIEF), erectile dysfunction was defined as IIEF<21. Detailed sample information in Table S1. Hospital did not provide the relevant sample information about erectile function patients. Before participants were included in the analysis, it was confirmed that they did not have metabolic diseases.

Table S1. Clinical Data of Participant

|                                             | healthy control (43) | Asthenozoospermia (56) | Oligozoospermia (36) |
|---------------------------------------------|----------------------|------------------------|----------------------|
| Age                                         | 28.21±3.24           | 30.26±5.77             | 27.83±4.82           |
| Sperm concentration(10 <sup>6</sup> per ml) | 112.01±35.87         | 127.47±29.12           | 27.60±11.23          |
| Total progressive motility (a + b, %)       | 73.15±17.43          | 36.54±8.54             | 47.15±16.83          |
| Rapid progressive motility (a, %)           | 41.92±15.45          | 12.88±7.59             | 24.91±15.09          |
| Slow progressive motility (b, %)            | 31.23±12.97          | 23.66±9.92             | 22.23±6.44           |
| Deformity rate (%)                          | 7.43±3.12            | 12.73±2.95             | 14.44±5.00           |

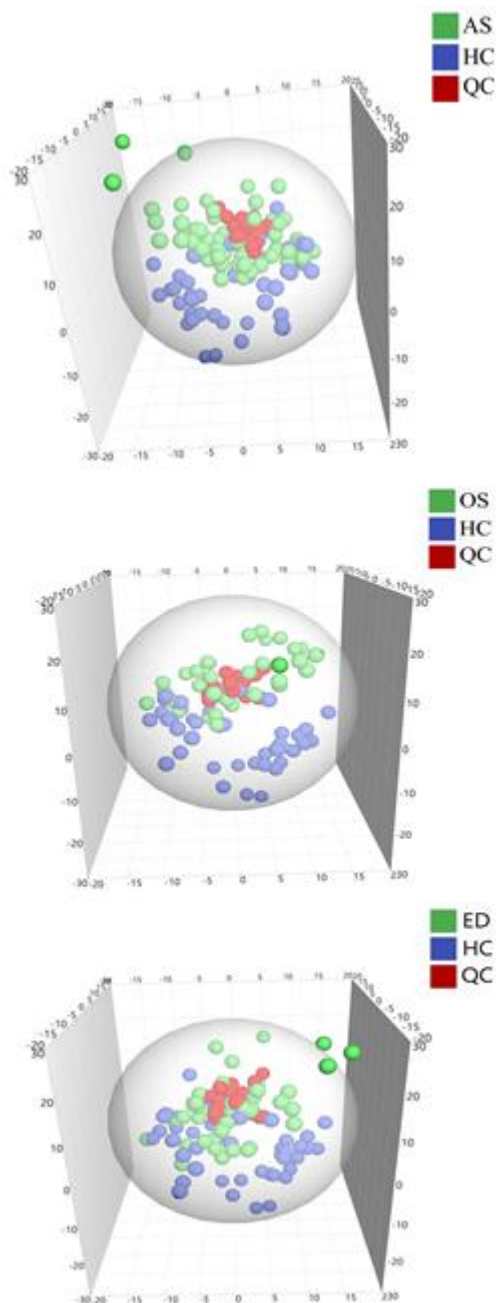

Fig.1S.The PCA score three-dimensional plots of (a) asthenospermia (AS) group, (b) oligozoospermia (OS) group and (c) erectile dysfunction (ED) group

**Qualitative process**

As for,  $m/z$  524.3698

Possible formulas were generated using the molecular formula predict software of Shimadzu LCMSsolution. Element number restriction, lewis check, isotopic pattern and hydrogen/carbon element ratio check were used to reduce the number of candidate molecular formulas. Molecular formula calculation software to obtain  $[M + H]$  the only possible formula is  $C_{26}H_{54}NO_4P$ . Further metabolites database search and found that the formula most likely corresponds to LysoPC (18:0).

From the MS/MS spectra, the metabolites have obvious characteristic phosphatidylcholine compounds  $m/z$  184.0735, 208.5433, 448.2923, 465.2359 and 507.3857. Finally, the MS/MS fragment of the LysoPC

(18:0) chemical standard is consistent with the metabolite, including to 184.0744, 208.5434, 448.2877, 465.2234 and 507.3608. The compound was further confirmed to be LysoPC (18:0). According to the above ideas, 23 potential biomarkers were finally identified, of which 10 metabolite identified and validated by the authorized chemical standard. Others are putatively identification by detailed comparisons with metabolite databases.

Table S2. Identification and fragmentation ions by liquid chromatography coupled with electrospray Ionization mass spectrometry

|    | Exact mass | Formula                                                                      | Metabolite                  | MS/MS fragments                                                  | Matched MS/MS fragments                                |
|----|------------|------------------------------------------------------------------------------|-----------------------------|------------------------------------------------------------------|--------------------------------------------------------|
| 1  | 467.3117   | C <sub>22</sub> H <sub>46</sub> NO <sub>7</sub> P                            | LysoPC(14:0)                | 184.0732, 391.2249<br>450.2928                                   | 184.0738, 391.2257<br>450.2979                         |
| 2  | 523.3724   | C <sub>26</sub> H <sub>54</sub> NO <sub>7</sub> P                            | LysoPC(18:0)                | 184.0735, 208.5433,<br>447.2923, 465.2359<br>506.3857            | 184.0744, 208.5434,<br>447.2877, 465.2234<br>5076.3608 |
| 3  | 529.2065   | C <sub>27</sub> H <sub>48</sub> NO <sub>7</sub> P                            | LysoPE(22:4)                | 287.2730, 315.2680,<br>389.3050, 469.2710                        | no                                                     |
| 4  | 605.8496   | C <sub>32</sub> H <sub>64</sub> NO <sub>7</sub> P                            | LysoPC(24:1)                | 184.0735, 307.3360,<br>349.3460, 407.3887,<br>423.3830, 588.4390 | no                                                     |
| 5  | 537.7196   | C <sub>27</sub> H <sub>56</sub> NO <sub>7</sub> P                            | LysoPE(22:0)                | 203.1807, 333.2806<br>399.3256, 475.4163<br>519.4070             | 203.1829, 333.2851<br>399.3259, 475.4172<br>519.4092   |
| 6  | 569.3612   | C <sub>30</sub> H <sub>52</sub> NO <sub>7</sub> P                            | LysoPC(22:5)                | 184.0737, 321.2087<br>457.2089, 501.2421                         | no                                                     |
| 7  | 251.2387   | C <sub>12</sub> H <sub>13</sub> NO <sub>5</sub>                              | N-phenylacetylaspartic acid | 192.0660, 206.0810<br>234.0760, 252.0870                         | 192.0671, 206.0817<br>234.0767, 252.0884               |
| 8  | 425.1131   | C <sub>13</sub> H <sub>22</sub> N <sub>4</sub> O <sub>8</sub> S <sub>2</sub> | S-Glutathionyl-L-cysteine   | 219.9889, 364.1604<br>350.0641                                   | no                                                     |
| 9  | 481.6480   | C <sub>25</sub> H <sub>39</sub> NO <sub>6</sub> S                            | N-Acetyl-LTE4               | 186.0161, 341.2067                                               | no                                                     |
| 10 | 441.0869   | C <sub>19</sub> H <sub>19</sub> N <sub>7</sub> O <sub>6</sub>                | Folic acid                  | 176.0540, 120.0457<br>295.0947                                   | 176.0556, 120.0462<br>295.0949                         |
| 11 | 260.1854   | C <sub>13</sub> H <sub>25</sub> NO <sub>4</sub>                              | Hexanoylcarnitine           | 99.0813, 146.1191<br>162.1134, 214.1834<br>242.1762              | 99.0867, 146.1189<br>162.1127, 214.1854<br>242.1771    |
| 12 | 344.2805   | C <sub>19</sub> H <sub>38</sub> NO <sub>4</sub>                              | Carnitine 12:0              | 115.0563, 184.0732<br>211.0633, 265.2718<br>303.2189             | 115.0574, 184.0767<br>211.0646, 265.2746<br>303.2194   |
| 13 | 481.3149   | C <sub>23</sub> H <sub>48</sub> NO <sub>7</sub> P                            | LysoPC(15:0)                | 184.0725, 339.2893<br>405.2541, 457.73444                        | no                                                     |
| 14 | 503.3391   | C <sub>25</sub> H <sub>46</sub> NO <sub>7</sub> P                            | LysoPE(20:3)                | 163.0155, 265.2724<br>367.1881, 445.2690<br>461.2639             | no                                                     |
| 15 | 505.3572   | C <sub>25</sub> H <sub>48</sub> NO <sub>7</sub> P                            | LysoPE(20:2)                | 163.0174, 311.2935<br>365.2712, 447.2899                         | no                                                     |

|    |          |                                                                               |                                         |                                                      |                    |
|----|----------|-------------------------------------------------------------------------------|-----------------------------------------|------------------------------------------------------|--------------------|
| 16 | 368.4874 | C <sub>19</sub> H <sub>28</sub> O <sub>5</sub> S                              | Testosterone sulfate                    | 171.9059, 242.9423<br>271.2060                       | no                 |
| 17 | 370.5071 | C <sub>19</sub> H <sub>30</sub> O <sub>5</sub> S                              | 5 $\alpha$ -Dihydrotestosterone sulfate | 232.9095, 242.9423<br>268.0499, 273.0923             | no                 |
| 18 | 227.0788 | C <sub>9</sub> H <sub>13</sub> N <sub>3</sub> O <sub>4</sub>                  | Deoxycytidine                           | 112.0507, 186.9537                                   | 112.0534, 186.9521 |
| 19 | 243.2190 | C <sub>9</sub> H <sub>13</sub> N <sub>3</sub> O <sub>5</sub>                  | Cytidine                                | 112.0482, 244.0934                                   | 112.0476, 244.0937 |
| 20 | 251.0210 | C <sub>10</sub> H <sub>12</sub> N <sub>4</sub> O <sub>4</sub>                 | Deoxyinosine                            | 137.0456, 253.0916                                   | no                 |
| 21 | 244.2338 | C <sub>9</sub> H <sub>12</sub> N <sub>2</sub> O <sub>6</sub>                  | Uridine                                 | 96.0123, 113.0367                                    | 96.0141, 113.0354  |
| 22 | 483.3078 | C <sub>26</sub> H <sub>45</sub> NO <sub>5</sub> S                             | Lithocholytaurine                       | 331.3015, 353.6796<br>359.2940, 405.2383<br>464.3150 | no                 |
| 23 | 488.1828 | C <sub>14</sub> H <sub>26</sub> N <sub>4</sub> O <sub>11</sub> P <sub>2</sub> | Citicoline                              | 134.3948, 175.5719<br>407.1243, 425.1273             | no                 |
